# Supplementary material for: Differentially Expressed MicroRNAs in Meningiomas Grades I and II Suggest Shared Biomarkers with Malignant Tumors
Source: PubMed Central journal article supplement (PMC4810115; doi:10.3390/cancers8030031), 2016-03-03

## Supplementary Materials

**Table S1a.** World Health Organization (WHO) grading of meningiomas. CBTRUS; Central Brain Tumor Registry of the United States <http://www.cbtrus.org/2011-NPCR-SEER/WEB-0407-Report-3-3-2011.pdf>.

| WHO Grade  | Description                                                                                                                                                                                                                                                                                                                                                                                                                                                                                                 |
|------------|-------------------------------------------------------------------------------------------------------------------------------------------------------------------------------------------------------------------------------------------------------------------------------------------------------------------------------------------------------------------------------------------------------------------------------------------------------------------------------------------------------------|
| <b>I</b>   | Meningiomas without features of grade II or III lesions. Low risk of recurrence and/or aggressive growth.                                                                                                                                                                                                                                                                                                                                                                                                   |
| <b>II</b>  | Atypical meningiomas, with brain invasion, and/or increased mitotic activity (defined as four or more per 10 high-power field (HPF),- though fewer than 20 mitoses per 10 HPF) and/or three or more of the following features: increased cellularity, small cells with high nucleus-to-cytoplasm ratio, prominent nucleoli, uninterrupted pattern-less or sheet-like growth, and foci of spontaneous or geographic necrosis.<br>Chordoid meningioma and Clear cell meningioma are also classified Grade II. |
| <b>III</b> | Anaplastic (malignant) meningiomas exhibit histological features of malignancy far in excess of the abnormalities present in atypical meningiomas. These features are increased mitotic rate (20 mitosis or more per 10 HPF) or malignant cytology like the morphology found in carcinoma, melanoma or high-grade sarcoma.<br>Rhabdoid meningioma and papillary meningioma are also classified Grade III.                                                                                                   |

In addition to the WHO grading the tumors are sub classified according to their morphological diversity, see Table S1b.

**Table S1b.** Sub classification of meningioma.

| Letter used in this study | Cell morphology              |
|---------------------------|------------------------------|
| A                         | Meningothelial               |
| B                         | Fibrous                      |
| C                         | Transitional (mixed A and B) |
| D                         | Psammomatous                 |
| E                         | Angiomatous                  |
| F                         | Microcystic                  |
| G                         | Secretory                    |
| H                         | Lymphoplasmocyte-rich        |



| Name                       | P2-N vs P2-T      | P1-N vs P1-T   | P2-N vs P16-NN  | P1-N vs P16-NN | P2-N vs P1-N | P2-T vs P1-T | Name           |
|----------------------------|-------------------|----------------|-----------------|----------------|--------------|--------------|----------------|
| hsa-miR-374a               |                   | UP (565)       | UP (565)        |                |              |              | hsa-miR-374a   |
| hsa-miR-374b               |                   | 3,89 UP (1146) |                 | 1,55 UP (739)  | UP (2873)    |              | hsa-miR-374b   |
| hsa-miR-376a UP (4058)     |                   | UP (692)       | UP (692)        |                | DOWN (4058)  |              | hsa-miR-376a   |
| hsa-miR-376c               | 8,14              | -1,93          | 4,16            | 2,10           | 1,98         | -7,92        | hsa-miR-376c   |
| hsa-miR-378                | 1,08 UP (770)     |                | -1,19 UP (591)  |                | DOWN (704)   | 1,01         | hsa-miR-378    |
| hsa-miR-382 UP (642)       |                   |                |                 |                |              |              | hsa-miR-382    |
| hsa-miR-409-3p             | 1,17              |                | 1,27 UP (727)   |                | DOWN (572)   |              | hsa-miR-409-3p |
| hsa-miR-421                |                   | UP (692)       |                 |                |              | DOWN (642)   | hsa-miR-421    |
| hsa-miR-423-3p             |                   | 1,41 UP (1069) |                 | 2,10 UP (508)  |              | DOWN (673)   | hsa-miR-423-3p |
| hsa-miR-423-5p             |                   | UP (668)       | UP (668)        |                |              | UP (718)     | hsa-miR-423-5p |
| hsa-miR-424                | 6,33              | 2,01           | 1,38            | 1,66           | -1,20        | -3,79        | hsa-miR-424    |
| hsa-miR-425                | 1,04              | -1,24          | 1,04            | 1,44           | -1,39        | -1,80        | hsa-miR-425    |
| hsa-miR-4286               | 1,83              | 1,73           | -2,49           | 2,19           | -5,44        | -5,74        | hsa-miR-4286   |
| hsa-miR-4454 DOWN (8074)   |                   | UP (907)       | -4,54 UP (1778) |                | DOWN (8074)  | UP (907)     | hsa-miR-4454   |
| hsa-miR-4488 DOWN (1175)   |                   |                |                 |                | DOWN (1175)  |              | hsa-miR-4488   |
| hsa-miR-4497 DOWN (1582)   |                   |                |                 |                | DOWN (1582)  |              | hsa-miR-4497   |
| hsa-miR-451                | 1,90              | -10,07         | 1,62            | -1,71          | 2,78         | -6,90        | hsa-miR-451    |
| hsa-miR-4516 DOWN (5047)   |                   |                |                 |                | DOWN (5047)  |              | hsa-miR-4516   |
| hsa-miR-4532 DOWN (2844)   |                   |                |                 |                | DOWN (2844)  |              | hsa-miR-4532   |
| hsa-miR-455-3p             |                   |                |                 |                |              |              | hsa-miR-455-3p |
| hsa-miR-483-3p UP (511)    |                   |                |                 |                |              | DOWN (511)   | hsa-miR-483-3p |
| hsa-miR-484                | 1,51              | 1,73           | 2,45            | 1,97           | 1,25         | 1,43         | hsa-miR-484    |
| hsa-miR-486-5p DOWN (2281) |                   | DOWN (2130)    | -1,64           | -1,53          | -1,07        |              | hsa-miR-486-5p |
| hsa-miR-487b UP (714)      |                   |                |                 |                |              | DOWN (714)   | hsa-miR-487b   |
| hsa-miR-495                |                   | UP (818)       | UP (627)        | UP (627)       |              | UP (818)     | hsa-miR-495    |
| hsa-miR-497 UP (1124)      |                   | DOWN (1216)    |                 | DOWN (1216)    | UP (1216)    | DOWN (1124)  | hsa-miR-497    |
| hsa-miR-532-5p UP (799)    |                   | 1,47 UP (3531) |                 | 1,90 UP (1859) |              | 3,42         | hsa-miR-532-5p |
| hsa-miR-574-3p             | -3,88             | 2,74           | 3,46            | 2,81           | 1,23         | 13,12        | hsa-miR-574-3p |
| hsa-miR-574-5p             | -4,86 DOWN (1762) |                | -2,64           | -1,61          | -1,64        | DOWN (596)   | hsa-miR-574-5p |
| hsa-miR-590-5p UP (504)    |                   |                |                 |                | DOWN (504)   |              | hsa-miR-590-5p |
| hsa-miR-654-3p             |                   |                | UP (596)        | UP (596)       |              | DOWN (504)   | hsa-miR-654-3p |
| hsa-miR-660 UP (712)       |                   |                |                 |                |              | DOWN (712)   | hsa-miR-660    |
| hsa-miR-708 UP (642)       |                   |                | UP (512)        | UP (512)       |              | DOWN (642)   | hsa-miR-708    |
| hsa-miR-720 DOWN (914)     |                   |                | DOWN (914)      |                | DOWN (914)   |              | hsa-miR-720    |
| hsa-miR-744                |                   | UP (551)       |                 |                |              | UP (551)     | hsa-miR-744    |
| hsa-miR-874                |                   | UP (822)       | UP (839)        | UP (839)       |              | UP (822)     | hsa-miR-874    |
| hsa-miR-92a                | -1,63             | -1,45          | -1,10           | 1,78           | -1,97        | -1,75        | hsa-miR-92a    |
| hsa-miR-93 UP (1448)       |                   | DOWN (1339)    | DOWN (1339)     | UP (1339)      | DOWN (1448)  |              | hsa-miR-93     |
| hsa-miR-98                 | -1,37 UP (915)    |                | DOWN (1489)     | DOWN (1489)    |              | -1,19        | hsa-miR-98     |
| hsa-miR-99a                | 5,43              | -1,31          | -1,78           | -2,07          | 1,17         | -6,09        | hsa-miR-99a    |
| hsa-miR-99b                |                   | 2,17 UP (2070) |                 | 1,26 UP (1642) |              | UP (3558)    | hsa-miR-99b    |

Discarded miRNAs with raw-read less than 50  
Cutoff after normalization is 500 reads/million

Red = Overexpression in T vs N  
Blue = Suppression in T vs N

Down = Detected in N, not in T  
UP = Detected in T, not in N  
Detected values (pr. Million) in brackets

**Table S2b.** Summary of normalized (by totals) SOLiD miRNA reads, values in reads pr. million. For total miRNAs from meningioma tumors (T) or dura (N or NN). P, patient (numbers as in Table 1).

| <b>miRNA</b>        | <b>P no. 16<br/>NN</b> | <b>P no. 23*<br/>NN</b> | <b>P no. 2<br/>N</b> | <b>P no. 2<br/>T</b> | <b>P no. 1<br/>N</b> | <b>P no. 1<br/>T</b> |
|---------------------|------------------------|-------------------------|----------------------|----------------------|----------------------|----------------------|
| hsa-let-7a          | 14763                  | 14316                   | 18985                | 19597                | 16719                | 21396                |
| hsa-let-7a_star     | 208                    |                         | 351                  | 130                  | 154                  | 224                  |
| hsa-let-7a-2_star   | 18                     |                         |                      |                      | 6                    | 26                   |
| hsa-let-7b          | 13218                  | 23120                   | 18871                | 6458                 | 14606                | 6277                 |
| hsa-let-7b_star     | 219                    |                         | 1289                 | 74                   | 127                  | 243                  |
| hsa-let-7c          | 1147                   |                         | 2424                 | 2236                 | 1828                 | 718                  |
| hsa-let-7d          | 3445                   |                         | 1385                 | 1953                 | 1908                 | 4170                 |
| hsa-let-7d_star     | 410                    |                         |                      |                      | 161                  | 138                  |
| hsa-let-7e          | 1346                   |                         | 662                  | 3223                 | 1311                 | 1854                 |
| hsa-let-7e_star     | 51                     |                         |                      |                      | 18                   | 54                   |
| hsa-let-7f          | 11591                  | 5183                    | 8328                 | 21310                | 11867                | 22788                |
| hsa-let-7f-1_star   | 57                     |                         | 186                  |                      | 20                   | 47                   |
| hsa-let-7f-2_star   | 27                     |                         | 228                  |                      | 33                   | 42                   |
| hsa-let-7g          | 11438                  |                         | 3773                 | 39528                | 11849                | 16564                |
| hsa-let-7g_star     | 31                     |                         |                      |                      | 17                   | 22                   |
| hsa-let-7i          | 187                    |                         | 1052                 | 910                  | 1167                 | 169                  |
| hsa-let-7i_star     | 461                    |                         |                      | 204                  | 285                  | 136                  |
| hsa-miR-1           | 58                     |                         |                      |                      | 350                  | 33                   |
| hsa-miR-100         | 14501                  | 19171                   | 18683                | 31635                | 26691                | 43785                |
| hsa-miR-100_star    |                        |                         |                      |                      |                      | 16                   |
| hsa-miR-101         | 2315                   |                         | 1118                 | 7305                 | 4178                 | 2980                 |
| hsa-miR-101_star    | 6                      |                         | 174                  | 42                   | 79                   | 48                   |
| hsa-miR-103a        | 66298                  | 9051                    | 16360                | 65055                | 35222                | 90773                |
| hsa-miR-103a-2_star | 15                     |                         |                      | 73                   | 21                   | 45                   |
| hsa-miR-106a        | 80                     |                         | 171                  |                      | 63                   | 18                   |
| hsa-miR-106b        | 768                    |                         | 294                  | 346                  | 613                  | 525                  |
| hsa-miR-106b_star   | 334                    |                         | 189                  | 74                   | 196                  | 114                  |
| hsa-miR-107         | 3037                   |                         | 1711                 | 7813                 | 2336                 | 4455                 |
| hsa-miR-10a         | 210                    |                         | 1205                 |                      | 157                  | 57                   |
| hsa-miR-10b         | 1601                   |                         | 1088                 | 332                  | 1576                 | 45                   |
| hsa-miR-10b_star    |                        |                         |                      |                      | 9                    |                      |
| hsa-miR-1179        |                        |                         |                      |                      | 9                    | 8                    |
| hsa-miR-1180        | 50                     |                         |                      |                      | 33                   | 66                   |
| hsa-miR-1185        | 15                     |                         |                      | 70                   | 9                    | 7                    |
| hsa-miR-122         | 24                     | 66562                   | 283989               | 3482                 | 115                  |                      |
| hsa-miR-122_star    |                        |                         | 2401                 | 41                   |                      |                      |
| hsa-miR-1226        | 23                     |                         |                      | 64                   | 14                   | 25                   |
| hsa-miR-1227        | 16                     |                         |                      |                      | 11                   |                      |
| hsa-miR-1228        | 9                      |                         |                      |                      |                      | 11                   |
| hsa-miR-124         | 25                     |                         |                      |                      | 33                   | 9                    |
| hsa-miR-1246        | 13                     |                         | 177                  |                      |                      | 13                   |
| hsa-miR-1247        | 50                     |                         |                      |                      | 249                  | 26                   |
| hsa-miR-1248        | 23                     |                         |                      |                      | 31                   | 14                   |
| hsa-miR-1249        | 46                     |                         |                      | 61                   | 13                   | 27                   |
| hsa-miR-125a-3p     | 21                     |                         |                      |                      | 13                   | 20                   |
| hsa-miR-125a-5p     | 28497                  | 11272                   | 13243                | 30318                | 30475                | 71639                |
| hsa-miR-125b        | 82386                  | 67797                   | 44735                | 104527               | 78409                | 180627               |
| hsa-miR-125b-1_star | 32                     |                         |                      |                      | 58                   | 55                   |
| hsa-miR-125b-2_star | 62                     |                         |                      | 41                   | 53                   | 38                   |
| hsa-miR-126         | 24087                  |                         | 7016                 | 3775                 | 39252                | 10386                |
| hsa-miR-126_star    | 19989                  | 4196                    | 6066                 | 3775                 | 22332                | 4317                 |
| hsa-miR-1260        | 1295                   |                         | 1774                 | 1873                 | 280                  | 698                  |
| hsa-miR-1260b       | 1566                   |                         | 2601                 | 1956                 | 371                  | 830                  |

| <b>miRNA</b>       | <b>P no. 16<br/>NN</b> | <b>P no. 23*<br/>NN</b> | <b>P no. 2<br/>N</b> | <b>P no. 2<br/>T</b> | <b>P no. 1<br/>N</b> | <b>P no. 1<br/>T</b> |
|--------------------|------------------------|-------------------------|----------------------|----------------------|----------------------|----------------------|
| hsa-miR-127-3p     | 180                    |                         |                      | 279                  | 46                   | 56                   |
| hsa-miR-127-5p     | 49                     |                         |                      | 129                  | 17                   | 24                   |
| hsa-miR-1270       |                        |                         |                      |                      | 19                   | 10                   |
| hsa-miR-1271       | 52                     |                         |                      |                      | 48                   | 159                  |
| hsa-miR-1275       | 8                      |                         | 225                  |                      | 28                   | 40                   |
| hsa-miR-128        | 565                    |                         | 2520                 | 341                  | 276                  | 664                  |
| hsa-miR-1280       | 235                    |                         | 494                  | 91                   | 47                   | 165                  |
| hsa-miR-1285       | 7                      |                         |                      |                      | 8                    |                      |
| hsa-miR-1287       | 29                     |                         |                      | 73                   | 12                   | 61                   |
| hsa-miR-129-3p     | 15                     |                         |                      |                      | 8                    | 82                   |
| hsa-miR-1290       | 8                      |                         |                      |                      | 6                    |                      |
| hsa-miR-1291       |                        |                         |                      |                      | 21                   | 7                    |
| hsa-miR-1296       | 11                     |                         |                      |                      | 17                   | 7                    |
| hsa-miR-1299       | 6                      |                         |                      |                      | 6                    | 9                    |
| hsa-miR-1301       | 39                     |                         |                      |                      | 30                   | 73                   |
| hsa-miR-130a       | 6341                   |                         | 2107                 | 13311                | 13666                | 13901                |
| hsa-miR-130b       | 576                    |                         | 177                  | 111                  | 456                  | 237                  |
| hsa-miR-130b_star  | 107                    |                         | 201                  |                      | 28                   | 65                   |
| hsa-miR-132        | 121                    |                         |                      | 99                   | 80                   | 163                  |
| hsa-miR-132_star   | 61                     |                         |                      | 95                   | 52                   | 148                  |
| hsa-miR-133a       |                        |                         |                      |                      | 20                   |                      |
| hsa-miR-134        | 581                    |                         | 201                  | 225                  | 266                  | 307                  |
| hsa-miR-1343       | 20                     |                         |                      |                      | 5                    | 29                   |
| hsa-miR-135a       |                        |                         | 306                  |                      | 21                   |                      |
| hsa-miR-135b       | 8                      |                         |                      |                      | 11                   | 7                    |
| hsa-miR-136        | 45                     |                         |                      | 1500                 | 179                  | 164                  |
| hsa-miR-136_star   | 58                     |                         |                      | 111                  | 52                   | 39                   |
| hsa-miR-138        | 76                     |                         | 839                  |                      | 120                  | 1400                 |
| hsa-miR-138-1_star | 8                      |                         | 189                  |                      | 14                   | 155                  |
| hsa-miR-139-3p     |                        |                         |                      |                      | 7                    |                      |
| hsa-miR-139-5p     | 1626                   |                         | 893                  | 179                  | 367                  | 182                  |
| hsa-miR-140-3p     | 10653                  | 10778                   | 4001                 | 3940                 | 25987                | 9205                 |
| hsa-miR-140-5p     | 1437                   |                         | 902                  | 1401                 | 4596                 | 1098                 |
| hsa-miR-141        | 10                     |                         | 183                  |                      | 13                   | 10                   |
| hsa-miR-142-3p     | 998                    |                         | 692                  | 905                  | 1118                 | 149                  |
| hsa-miR-142-5p     | 351                    |                         | 974                  | 141                  | 392                  | 52                   |
| hsa-miR-143        | 6725                   | 4278                    | 5424                 | 3116                 | 10714                | 2071                 |
| hsa-miR-143_star   | 18                     |                         |                      |                      |                      |                      |
| hsa-miR-144        | 175                    |                         | 1310                 | 1673                 | 3042                 | 75                   |
| hsa-miR-144_star   | 350                    |                         | 2733                 | 152                  | 796                  | 120                  |
| hsa-miR-145        | 47176                  | 16126                   | 23271                | 9475                 | 31451                | 14892                |
| hsa-miR-145_star   | 90                     |                         | 255                  | 45                   | 107                  | 17                   |
| hsa-miR-146a       | 383                    |                         | 285                  | 998                  | 621                  | 95                   |
| hsa-miR-146b-3p    | 10                     |                         |                      |                      | 22                   | 17                   |
| hsa-miR-146b-5p    | 415                    |                         | 291                  | 207                  | 484                  | 468                  |
| hsa-miR-147b       | 8                      |                         |                      |                      | 20                   | 7                    |
| hsa-miR-148a       | 2829                   |                         | 2820                 | 7097                 | 2367                 | 6551                 |
| hsa-miR-148a_star  | 7                      |                         |                      |                      |                      | 13                   |
| hsa-miR-148b       | 402                    | 6253                    | 6380                 | 1061                 | 287                  | 255                  |
| hsa-miR-148b_star  | 6                      |                         |                      |                      | 8                    | 7                    |
| hsa-miR-149        | 201                    |                         | 587                  | 42                   | 144                  | 441                  |
| hsa-miR-150        | 4784                   |                         | 689                  | 3160                 | 1445                 | 580                  |
| hsa-miR-151-3p     | 620                    |                         | 183                  | 157                  | 1271                 | 1034                 |
| hsa-miR-151-5p     | 3570                   |                         | 668                  | 2074                 | 4051                 | 5796                 |
| hsa-miR-151b       |                        |                         |                      |                      | 7                    | 10                   |
| hsa-miR-152        | 1622                   |                         | 899                  | 5672                 | 1878                 | 2130                 |
| hsa-miR-153        | 21                     |                         |                      |                      | 67                   | 33                   |
| hsa-miR-154        | 93                     |                         |                      | 99                   | 47                   | 42                   |

| <b>miRNA</b>                     | <b>P no. 16<br/>NN</b> | <b>P no. 23*<br/>NN</b> | <b>P no. 2<br/>N</b> | <b>P no. 2<br/>T</b> | <b>P no. 1<br/>N</b> | <b>P no. 1<br/>T</b> |
|----------------------------------|------------------------|-------------------------|----------------------|----------------------|----------------------|----------------------|
| hsa-miR-154_star                 | 74                     |                         |                      | 93                   | 9                    | 22                   |
| hsa-miR-155                      | 35                     |                         |                      | 64                   | 7                    | 7                    |
| hsa-miR-15a                      | 1917                   |                         | 2296                 | 553                  | 1189                 | 1100                 |
| hsa-miR-15a_star                 |                        |                         |                      |                      | 17                   | 29                   |
| hsa-miR-15b                      | 6385                   | 5101                    | 2886                 | 1216                 | 2023                 | 1555                 |
| hsa-miR-15b_star                 | 80                     |                         | 818                  |                      | 319                  | 62                   |
| hsa-miR-16                       | 3597                   |                         | 1807                 | 125                  | 2026                 | 1430                 |
| hsa-miR-16-2_star                | 398                    |                         | 1627                 | 76                   | 865                  | 237                  |
| hsa-miR-17                       | 2140                   | 10285                   | 21251                | 2054                 | 3894                 | 2796                 |
| hsa-miR-17_star                  | 64                     |                         | 381                  | 337                  | 103                  | 114                  |
| hsa-miR-181a                     | 25422                  |                         | 2691                 | 8285                 | 4306                 | 14250                |
| hsa-miR-181a_star                | 191                    |                         | 210                  | 127                  | 121                  | 416                  |
| hsa-miR-181a-2_star              | 35                     |                         |                      | 99                   | 164                  | 99                   |
| hsa-miR-181b                     | 1559                   |                         | 674                  | 881                  | 634                  | 1012                 |
| hsa-miR-181c                     | 277                    |                         |                      | 386                  | 186                  | 792                  |
| hsa-miR-181c_star                | 8                      |                         |                      | 45                   | 10                   | 61                   |
| hsa-miR-181d                     | 26                     |                         |                      |                      | 7                    | 32                   |
| hsa-miR-182                      | 307                    |                         | 468                  |                      | 87                   | 38                   |
| hsa-miR-183                      | 56                     |                         |                      |                      | 29                   | 9                    |
| hsa-miR-185                      | 3394                   | 11601                   | 4957                 | 1954                 | 2946                 | 1564                 |
| hsa-miR-185_star                 |                        |                         |                      |                      | 5                    |                      |
| hsa-miR-186                      | 1538                   |                         | 551                  | 615                  | 2535                 | 1288                 |
| hsa-miR-186_star                 | 11                     |                         |                      |                      | 18                   | 11                   |
| hsa-miR-187                      | 79                     |                         |                      |                      | 12                   |                      |
| hsa-miR-188-3p                   | 8                      |                         |                      |                      | 6                    |                      |
| hsa-miR-188-5p                   | 90                     |                         |                      | 61                   | 65                   | 42                   |
| hsa-miR-18a                      | 156                    |                         | 438                  |                      | 51                   | 56                   |
| hsa-miR-18a_star                 | 18                     |                         |                      |                      | 12                   | 8                    |
| hsa-miR-18b                      | 19                     |                         |                      |                      | 11                   |                      |
| hsa-miR-190                      | 68                     |                         |                      | 133                  | 182                  | 267                  |
| hsa-miR-190b                     |                        |                         |                      |                      | 8                    |                      |
| hsa-miR-191                      | 15255                  | 6089                    | 6731                 | 9679                 | 12564                | 33379                |
| hsa-miR-191_star                 |                        |                         |                      |                      |                      | 11                   |
| hsa-miR-192                      | 1086                   |                         | 539                  | 456                  | 2346                 | 4020                 |
| hsa-miR-192_star                 |                        |                         |                      |                      | 9                    | 9                    |
| hsa-miR-193a-3p                  | 164                    |                         | 435                  | 491                  | 252                  | 66                   |
| hsa-miR-193a-5p                  | 864                    |                         |                      |                      | 130                  | 164                  |
| hsa-miR-193b                     | 3272                   |                         | 1304                 | 98                   | 2971                 | 514                  |
| hsa-miR-193b_star                | 83                     |                         |                      |                      | 333                  | 47                   |
| hsa-miR-194                      | 78                     |                         | 183                  | 58                   | 140                  | 102                  |
| hsa-miR-195                      | 4378                   |                         | 435                  | 781                  | 5993                 | 1879                 |
| hsa-miR-195_star                 | 38                     |                         |                      |                      | 89                   | 27                   |
| hsa-miR-196a                     | 7                      |                         |                      |                      | 5                    | 7                    |
| hsa-miR-196b                     |                        |                         |                      |                      | 8                    |                      |
| hsa-miR-197                      | 1015                   |                         | 623                  | 549                  | 651                  | 741                  |
| hsa-miR-1973                     | 9                      |                         |                      |                      | 7                    |                      |
| hsa-miR-199a-3p//hsa-miR-199b-3p | 40563                  | 27398                   | 16045                | 16436                | 34066                | 14294                |
| hsa-miR-199a-5p                  | 15187                  | 117657                  | 32612                | 8547                 | 36026                | 5811                 |
| hsa-miR-199b-5p                  | 3059                   |                         | 509                  | 1809                 | 3593                 | 312                  |
| hsa-miR-19a                      | 874                    |                         | 2922                 | 1494                 | 1088                 | 434                  |
| hsa-miR-19a_star                 |                        |                         |                      |                      | 5                    |                      |
| hsa-miR-19b                      | 3306                   | 10367                   | 11418                | 9620                 | 5700                 | 1972                 |
| hsa-miR-19b-1_star               | 9                      |                         |                      |                      | 17                   | 19                   |
| hsa-miR-200a                     |                        | 5101                    | 3147                 | 114                  |                      |                      |
| hsa-miR-200b                     |                        |                         | 803                  |                      |                      |                      |
| hsa-miR-200c                     | 19                     |                         | 159                  |                      | 10                   | 16                   |
| hsa-miR-202_star                 |                        |                         |                      |                      | 6                    |                      |

| <b>miRNA</b>       | <b>P no. 16<br/>NN</b> | <b>P no. 23*<br/>NN</b> | <b>P no. 2<br/>N</b> | <b>P no. 2<br/>T</b> | <b>P no. 1<br/>N</b> | <b>P no. 1<br/>T</b> |
|--------------------|------------------------|-------------------------|----------------------|----------------------|----------------------|----------------------|
| hsa-miR-203        | 26                     | 4608                    | 183                  |                      | 105                  | 26                   |
| hsa-miR-204        | 66                     | 9380                    |                      | 1682                 | 377                  | 1488                 |
| hsa-miR-205        | 12                     | 19171                   |                      | 83                   | 6                    |                      |
| hsa-miR-206        |                        |                         |                      |                      | 19                   |                      |
| hsa-miR-20a        | 772                    |                         | 9021                 | 336                  | 864                  | 1112                 |
| hsa-miR-20a_star   | 20                     |                         |                      |                      | 28                   | 61                   |
| hsa-miR-20b        | 349                    |                         |                      | 83                   | 331                  | 105                  |
| hsa-miR-21         | 35992                  |                         | 11583                | 6383                 | 3958                 | 1171                 |
| hsa-miR-21_star    | 113                    |                         |                      |                      | 24                   |                      |
| hsa-miR-210        | 108                    |                         | 2311                 | 5030                 | 240                  | 986                  |
| hsa-miR-2110       | 14                     |                         |                      |                      | 24                   | 17                   |
| hsa-miR-2114       |                        |                         |                      |                      | 6                    | 7                    |
| hsa-miR-2114_star  |                        |                         |                      |                      |                      | 8                    |
| hsa-miR-2116_star  | 13                     |                         |                      |                      |                      |                      |
| hsa-miR-212        | 12                     |                         |                      |                      | 8                    | 14                   |
| hsa-miR-214        | 24155                  | 12753                   | 2661                 | 3158                 | 11793                | 4759                 |
| hsa-miR-214_star   | 33                     |                         |                      |                      | 48                   | 21                   |
| hsa-miR-215        | 15                     |                         | 258                  |                      | 18                   | 10                   |
| hsa-miR-218        | 1730                   |                         | 1394                 | 11912                | 2917                 | 22136                |
| hsa-miR-22         | 1826                   | 12753                   | 16786                | 4784                 | 1966                 | 1826                 |
| hsa-miR-22_star    | 354                    |                         | 1013                 | 94                   | 59                   | 55                   |
| hsa-miR-221        | 2172                   |                         | 8766                 | 3264                 | 3006                 | 895                  |
| hsa-miR-221_star   | 28                     |                         |                      |                      | 17                   |                      |
| hsa-miR-222        | 1092                   |                         | 2589                 | 231                  | 701                  | 66                   |
| hsa-miR-223        | 11400                  | 7487                    | 4169                 | 16501                | 3933                 | 4141                 |
| hsa-miR-223_star   | 14                     |                         |                      |                      | 23                   |                      |
| hsa-miR-224        | 88                     |                         |                      | 45                   | 27                   | 18                   |
| hsa-miR-224_star   | 84                     |                         |                      | 240                  | 52                   | 97                   |
| hsa-miR-2355-3p    | 11                     |                         |                      |                      | 12                   |                      |
| hsa-miR-2355-5p    |                        |                         |                      |                      | 16                   | 8                    |
| hsa-miR-23a        | 20610                  | 10038                   | 12440                | 17415                | 8517                 | 6985                 |
| hsa-miR-23a_star   | 13                     |                         |                      |                      |                      |                      |
| hsa-miR-23b        | 8880                   |                         | 6932                 | 6010                 | 5504                 | 12250                |
| hsa-miR-23b_star   | 10                     |                         |                      |                      | 7                    | 13                   |
| hsa-miR-24         | 36173                  | 7487                    | 13630                | 27275                | 46928                | 32927                |
| hsa-miR-24-1_star  | 12                     |                         |                      |                      | 55                   | 35                   |
| hsa-miR-24-2_star  | 263                    |                         |                      | 121                  | 230                  | 87                   |
| hsa-miR-25         | 1612                   |                         | 2344                 | 718                  | 1644                 | 1149                 |
| hsa-miR-26a        | 37546                  | 8310                    | 17121                | 26328                | 23183                | 49049                |
| hsa-miR-26a-1_star | 16                     |                         |                      |                      | 10                   | 12                   |
| hsa-miR-26a-2_star | 21                     |                         |                      |                      | 43                   | 21                   |
| hsa-miR-26b        | 6165                   |                         | 1771                 | 1393                 | 6754                 | 12337                |
| hsa-miR-26b_star   | 54                     |                         |                      | 85                   | 50                   | 145                  |
| hsa-miR-27a        | 5610                   |                         | 1969                 | 4556                 | 3078                 | 1842                 |
| hsa-miR-27a_star   | 30                     |                         |                      |                      | 33                   |                      |
| hsa-miR-27b        | 1786                   |                         | 1424                 | 1057                 | 1895                 | 4405                 |
| hsa-miR-27b_star   | 87                     |                         |                      | 42                   | 92                   | 130                  |
| hsa-miR-28-3p      | 816                    |                         | 225                  |                      | 639                  | 1094                 |
| hsa-miR-28-5p      | 381                    |                         |                      | 116                  | 173                  | 339                  |
| hsa-miR-296-3p     |                        |                         |                      |                      | 12                   | 19                   |
| hsa-miR-296-5p     | 113                    |                         |                      |                      | 43                   | 301                  |
| hsa-miR-299-3p     | 62                     |                         |                      |                      | 5                    | 32                   |
| hsa-miR-299-5p     | 216                    |                         |                      | 78                   | 42                   | 83                   |
| hsa-miR-29a        | 12908                  |                         | 4663                 | 4782                 | 11751                | 14356                |
| hsa-miR-29a_star   | 37                     |                         |                      | 40                   | 129                  | 56                   |
| hsa-miR-29b        | 16086                  |                         | 12608                | 26577                | 18305                | 26358                |
| hsa-miR-29b-1_star | 39                     |                         |                      |                      | 10                   | 43                   |
| hsa-miR-29b-2_star | 59                     |                         |                      | 81                   | 27                   | 94                   |

| <b>miRNA</b>       | <b>P no. 16<br/>NN</b> | <b>P no. 23*<br/>NN</b> | <b>P no. 2<br/>N</b> | <b>P no. 2<br/>T</b> | <b>P no. 1<br/>N</b> | <b>P no. 1<br/>T</b> |
|--------------------|------------------------|-------------------------|----------------------|----------------------|----------------------|----------------------|
| hsa-miR-29c        | 4252                   | 14810                   | 28108                | 7011                 | 8942                 | 10750                |
| hsa-miR-29c_star   | 147                    |                         | 1160                 | 295                  | 326                  | 382                  |
| hsa-miR-301a       | 146                    |                         | 914                  | 443                  | 122                  | 307                  |
| hsa-miR-301b       | 14                     |                         |                      |                      | 11                   | 7                    |
| hsa-miR-3065-3p    |                        |                         |                      |                      | 8                    | 7                    |
| hsa-miR-3065-5p    |                        |                         |                      |                      | 6                    | 10                   |
| hsa-miR-30a        | 2804                   |                         | 438                  | 1697                 | 6514                 | 5206                 |
| hsa-miR-30a_star   | 179                    |                         | 572                  | 182                  | 308                  | 413                  |
| hsa-miR-30b        | 3285                   | 7734                    | 7594                 | 17976                | 4763                 | 4519                 |
| hsa-miR-30c        | 5930                   | 7405                    | 8400                 | 20163                | 6128                 | 10694                |
| hsa-miR-30c-1_star |                        |                         |                      |                      | 7                    | 8                    |
| hsa-miR-30c-2_star |                        |                         |                      |                      | 18                   | 35                   |
| hsa-miR-30d        | 2839                   |                         | 1079                 | 718                  | 3718                 | 2644                 |
| hsa-miR-30d_star   | 6                      |                         |                      |                      | 14                   | 10                   |
| hsa-miR-30e        | 1010                   |                         | 3422                 | 1725                 | 1801                 | 1253                 |
| hsa-miR-30e_star   | 364                    |                         | 183                  | 300                  | 516                  | 423                  |
| hsa-miR-31         | 402                    |                         | 5302                 | 43                   | 459                  | 215                  |
| hsa-miR-31_star    |                        |                         |                      |                      | 5                    |                      |
| hsa-miR-3152-5p    |                        |                         |                      |                      | 6                    |                      |
| hsa-miR-3154       |                        |                         |                      |                      | 16                   | 11                   |
| hsa-miR-3182       | 22                     |                         |                      |                      | 24                   | 11                   |
| hsa-miR-3194-5p    |                        |                         |                      |                      | 5                    |                      |
| hsa-miR-3196       | 20                     |                         | 192                  |                      |                      |                      |
| hsa-miR-32         | 72                     |                         |                      | 78                   | 103                  | 112                  |
| hsa-miR-32_star    | 26                     |                         |                      |                      | 28                   | 52                   |
| hsa-miR-3200-3p    |                        |                         |                      |                      | 6                    | 18                   |
| hsa-miR-320a       | 2325                   | 8557                    | 9614                 | 2254                 | 4737                 | 2292                 |
| hsa-miR-320b       | 78                     |                         |                      | 40                   | 154                  | 40                   |
| hsa-miR-320c       | 22                     |                         |                      |                      | 72                   | 23                   |
| hsa-miR-320d       | 9                      |                         |                      |                      | 48                   | 11                   |
| hsa-miR-323-3p     | 105                    |                         |                      | 85                   | 18                   | 135                  |
| hsa-miR-323b-3p    | 87                     |                         |                      |                      |                      | 42                   |
| hsa-miR-324-3p     |                        |                         |                      |                      | 7                    |                      |
| hsa-miR-324-5p     | 186                    |                         |                      | 429                  | 102                  | 140                  |
| hsa-miR-326        | 555                    |                         | 246                  | 330                  | 314                  | 528                  |
| hsa-miR-328        | 617                    |                         | 324                  | 291                  | 589                  | 1574                 |
| hsa-miR-329        | 147                    |                         |                      | 164                  | 35                   | 132                  |
| hsa-miR-330-3p     | 144                    |                         |                      |                      | 13                   | 72                   |
| hsa-miR-330-5p     | 6                      |                         |                      |                      |                      |                      |
| hsa-miR-331-3p     | 2483                   |                         | 611                  | 1503                 | 1535                 | 4699                 |
| hsa-miR-331-5p     | 7                      |                         |                      |                      |                      | 11                   |
| hsa-miR-335        | 313                    |                         | 168                  | 1144                 | 519                  | 1022                 |
| hsa-miR-335_star   | 46                     |                         |                      |                      |                      | 182                  |
| hsa-miR-337-3p     | 371                    |                         | 213                  | 592                  | 154                  | 255                  |
| hsa-miR-337-5p     | 205                    |                         |                      | 57                   | 129                  | 62                   |
| hsa-miR-338-3p     | 86                     |                         | 857                  | 113                  | 156                  | 327                  |
| hsa-miR-338-5p     | 18                     |                         |                      |                      | 34                   | 163                  |
| hsa-miR-339-3p     | 105                    |                         |                      |                      | 110                  | 99                   |
| hsa-miR-339-5p     | 477                    |                         | 1621                 | 1380                 | 377                  | 365                  |
| hsa-miR-33a        | 8                      |                         | 695                  | 177                  | 53                   | 140                  |
| hsa-miR-33a_star   | 21                     |                         |                      | 54                   | 30                   | 161                  |
| hsa-miR-33b        | 11                     |                         |                      | 134                  | 11                   | 25                   |
| hsa-miR-33b_star   | 26                     |                         |                      |                      | 18                   | 41                   |
| hsa-miR-340        | 147                    |                         |                      | 48                   | 63                   | 121                  |
| hsa-miR-340_star   | 103                    |                         |                      | 65                   | 38                   | 266                  |
| hsa-miR-342-3p     | 5186                   |                         | 557                  | 1617                 | 1049                 | 7887                 |
| hsa-miR-342-5p     | 9                      |                         |                      |                      | 18                   | 10                   |
| hsa-miR-345        | 350                    |                         | 396                  | 1103                 | 369                  | 933                  |



| <b>miRNA</b>      | <b>P no. 16</b> | <b>P no. 23*</b> | <b>P no. 2</b> | <b>P no. 2</b> | <b>P no. 1</b> | <b>P no. 1</b> |
|-------------------|-----------------|------------------|----------------|----------------|----------------|----------------|
|                   | <b>NN</b>       | <b>NN</b>        | <b>N</b>       | <b>T</b>       | <b>N</b>       | <b>T</b>       |
| hsa-miR-34a       | 3208            | 5348             | 14993          | 25689          | 5387           | 3018           |
| hsa-miR-34a_star  | 55              |                  |                | 195            | 55             | 49             |
| hsa-miR-34b_star  | 7               |                  |                | 45             | 7              | 18             |
| hsa-miR-34c-5p    | 7               |                  |                | 337            | 29             | 31             |
| hsa-miR-3605-3p   | 14              |                  |                |                | 7              | 14             |
| hsa-miR-3605-5p   | 6               |                  |                |                | 5              | 11             |
| hsa-miR-3607-5p   | 13              |                  |                |                |                | 7              |
| hsa-miR-3609      |                 |                  |                |                | 5              |                |
| hsa-miR-361-3p    | 753             |                  |                | 62             | 404            | 848            |
| hsa-miR-361-5p    | 960             |                  |                | 425            | 430            | 982            |
| hsa-miR-3613-5p   | 40              |                  |                |                | 34             | 23             |
| hsa-miR-3615      | 35              |                  |                |                |                |                |
| hsa-miR-3616-3p   |                 |                  |                |                |                | 15             |
| hsa-miR-3617      |                 |                  |                |                |                | 17             |
| hsa-miR-362-3p    | 86              |                  |                | 98             | 93             | 36             |
| hsa-miR-362-5p    | 186             |                  |                |                | 52             | 66             |
| hsa-miR-3620      | 14              |                  |                |                |                | 22             |
| hsa-miR-3622a-5p  | 8               |                  |                |                | 11             | 20             |
| hsa-miR-363       | 109             |                  |                | 68             | 94             | 37             |
| hsa-miR-3647-3p   |                 |                  |                |                | 14             |                |
| hsa-miR-365       | 979             |                  | 249            | 122            | 621            | 376            |
| hsa-miR-3651      |                 |                  |                |                | 5              |                |
| hsa-miR-3656      | 18              |                  | 294            |                | 5              | 23             |
| hsa-miR-3679-5p   | 8               |                  |                |                | 5              | 9              |
| hsa-miR-369-3p    | 226             |                  |                | 89             | 53             | 56             |
| hsa-miR-369-5p    | 76              |                  |                | 69             | 40             | 55             |
| hsa-miR-370       | 394             |                  |                | 201            | 91             | 167            |
| hsa-miR-374a      | 565             |                  |                | 74             | 453            | 267            |
| hsa-miR-374a_star | 13              |                  |                |                | 22             | 22             |
| hsa-miR-374b      | 1146            |                  | 333            | 97             | 739            | 2873           |
| hsa-miR-374b_star | 8               |                  |                |                | 5              | 33             |
| hsa-miR-374c      | 6               |                  |                |                |                | 20             |
| hsa-miR-376a      | 692             |                  | 300            | 4058           | 478            | 136            |
| hsa-miR-376a_star | 86              |                  |                | 176            | 44             | 33             |
| hsa-miR-376b      | 57              |                  |                | 254            | 19             |                |
| hsa-miR-376c      | 2369            |                  | 569            | 4634           | 1129           | 585            |
| hsa-miR-377       | 20              |                  |                |                | 13             | 12             |
| hsa-miR-377_star  | 12              |                  |                |                | 6              | 10             |
| hsa-miR-378       | 591             |                  | 704            | 758            | 319            | 770            |
| hsa-miR-378_star  | 82              |                  |                | 91             | 48             | 83             |
| hsa-miR-378c      | 23              |                  |                | 52             | 16             | 31             |
| hsa-miR-378d      |                 |                  |                |                | 12             | 7              |
| hsa-miR-378f      |                 |                  |                |                |                | 8              |
| hsa-miR-379       | 324             |                  |                | 334            | 129            | 300            |
| hsa-miR-379_star  | 22              |                  |                |                |                | 16             |
| hsa-miR-380       | 25              |                  |                |                |                | 12             |
| hsa-miR-381       | 138             |                  |                | 112            | 40             | 62             |
| hsa-miR-382       | 375             |                  | 168            | 642            | 95             | 151            |
| hsa-miR-383       |                 |                  |                |                | 5              |                |
| hsa-miR-3909      | 9               |                  |                |                |                |                |
| hsa-miR-3928      |                 |                  |                |                | 10             |                |
| hsa-miR-3940-3p   | 15              |                  |                |                |                | 12             |
| hsa-miR-409-3p    | 727             |                  | 572            | 673            | 237            | 399            |
| hsa-miR-409-5p    | 66              |                  |                | 85             |                | 20             |
| hsa-miR-410       | 64              |                  |                |                | 9              | 12             |
| hsa-miR-411       | 8               |                  |                |                |                | 8              |
| hsa-miR-411_star  | 37              |                  |                |                | 7              | 20             |
| hsa-miR-421       | 396             |                  | 369            | 86             | 118            | 692            |

| <b>miRNA</b>     | <b>P no. 16</b> | <b>P no. 23*</b> | <b>P no. 2</b> | <b>P no. 2</b> | <b>P no. 1</b> | <b>P no. 1</b> |
|------------------|-----------------|------------------|----------------|----------------|----------------|----------------|
|                  | <b>NN</b>       | <b>NN</b>        | <b>N</b>       | <b>T</b>       | <b>N</b>       | <b>T</b>       |
| hsa-miR-423-3p   | 1069            |                  | 306            | 444            | 508            | 718            |
| hsa-miR-423-5p   | 668             |                  | 174            | 268            | 483            | 291            |
| hsa-miR-424      | 1860            |                  | 1346           | 8523           | 1119           | 2249           |
| hsa-miR-424_star | 10              |                  |                |                |                | 16             |
| hsa-miR-425      | 1289            |                  | 1244           | 1297           | 894            | 720            |
| hsa-miR-425_star | 53              |                  |                | 79             | 72             | 102            |
| hsa-miR-4284     | 7               |                  |                |                |                | 17             |
| hsa-miR-4286     | 1167            | 4361             | 2901           | 5295           | 533            | 922            |
| hsa-miR-4306     |                 |                  |                |                | 5              |                |
| hsa-miR-431      | 48              |                  |                | 54             |                |                |
| hsa-miR-432      | 88              |                  |                | 142            | 13             | 15             |
| hsa-miR-432_star | 6               |                  |                |                |                |                |
| hsa-miR-433      | 33              |                  |                | 68             |                |                |
| hsa-miR-4423-3p  |                 |                  |                |                | 7              | 44             |
| hsa-miR-4423-5p  |                 |                  |                |                |                | 70             |
| hsa-miR-4454     | 1778            | 24190            | 8074           | 359            | 258            | 907            |
| hsa-miR-4488     |                 |                  | 1175           |                |                | 12             |
| hsa-miR-4497     |                 |                  | 1582           |                |                |                |
| hsa-miR-449a     |                 |                  |                |                | 8              |                |
| hsa-miR-450a     | 39              |                  |                |                | 11             | 74             |
| hsa-miR-450b-5p  | 12              |                  |                |                | 7              | 28             |
| hsa-miR-451      | 113826          | 352065           | 70241          | 133577         | 194980         | 19357          |
| hsa-miR-4516     | 50              |                  | 5047           |                | 26             | 18             |
| hsa-miR-452      | 67              |                  |                | 393            | 85             | 31             |
| hsa-miR-4532     | 35              |                  | 2844           |                | 45             | 23             |
| hsa-miR-454      | 25              |                  |                |                |                | 25             |
| hsa-miR-454_star | 15              |                  |                |                | 14             | 42             |
| hsa-miR-455-3p   | 839             |                  |                | 79             | 311            | 92             |
| hsa-miR-455-5p   | 18              |                  |                |                | 48             |                |
| hsa-miR-4632     | 8               |                  |                |                |                |                |
| hsa-miR-4683     | 7               |                  |                |                | 14             |                |
| hsa-miR-4717-5p  |                 |                  |                |                | 4              |                |
| hsa-miR-4728-3p  | 15              |                  |                |                | 21             | 22             |
| hsa-miR-4731-3p  | 6               |                  |                |                |                |                |
| hsa-miR-4732-3p  | 8               |                  |                |                |                |                |
| hsa-miR-4732-5p  |                 |                  |                |                | 9              |                |
| hsa-miR-4772-3p  | 9               |                  |                |                |                |                |
| hsa-miR-4787-3p  | 7               |                  |                |                | 7              |                |
| hsa-miR-4792     |                 |                  |                |                | 14             |                |
| hsa-miR-4800-5p  |                 |                  |                |                | 5              |                |
| hsa-miR-483-3p   | 52              |                  |                | 511            | 18             | 143            |
| hsa-miR-483-5p   | 28              |                  |                | 372            | 66             | 40             |
| hsa-miR-484      | 4300            |                  | 1753           | 2646           | 2188           | 3777           |
| hsa-miR-485-3p   | 154             |                  |                | 51             | 34             | 41             |
| hsa-miR-485-5p   | 38              |                  |                |                | 11             | 20             |
| hsa-miR-486-3p   | 70              |                  |                |                | 77             |                |
| hsa-miR-486-5p   | 1390            |                  | 2281           | 48             | 2130           | 423            |
| hsa-miR-487a     | 68              |                  |                | 149            | 9              | 29             |
| hsa-miR-487b     | 377             |                  | 150            | 714            | 78             | 310            |
| hsa-miR-489      | 60              |                  |                | 137            | 39             | 38             |
| hsa-miR-491-5p   | 10              |                  |                |                | 46             | 18             |
| hsa-miR-493      | 26              |                  |                | 57             | 7              | 23             |
| hsa-miR-493_star | 95              |                  |                |                | 7              | 22             |
| hsa-miR-494      | 424             |                  |                | 216            | 67             | 275            |
| hsa-miR-495      | 627             |                  |                | 281            | 105            | 818            |
| hsa-miR-496      | 17              |                  |                |                |                |                |
| hsa-miR-497      | 482             |                  | 321            | 1124           | 1216           | 184            |
| hsa-miR-497_star |                 |                  |                |                | 19             |                |

| <b>miRNA</b>      | <b>P no. 16<br/>NN</b> | <b>P no. 23*<br/>NN</b> | <b>P no. 2<br/>N</b> | <b>P no. 2<br/>T</b> | <b>P no. 1<br/>N</b> | <b>P no. 1<br/>T</b> |
|-------------------|------------------------|-------------------------|----------------------|----------------------|----------------------|----------------------|
| hsa-miR-499-5p    |                        |                         |                      |                      | 11                   | 15                   |
| hsa-miR-500a      | 64                     |                         |                      |                      | 16                   | 11                   |
| hsa-miR-500a_star | 135                    |                         |                      |                      | 33                   | 34                   |
| hsa-miR-501-3p    | 14                     |                         |                      |                      | 6                    |                      |
| hsa-miR-501-5p    | 42                     |                         |                      |                      | 15                   | 8                    |
| hsa-miR-502-3p    | 377                    |                         |                      | 99                   | 165                  | 110                  |
| hsa-miR-503       | 24                     |                         |                      | 50                   | 13                   | 50                   |
| hsa-miR-504       | 19                     |                         |                      |                      |                      |                      |
| hsa-miR-505       | 350                    |                         | 159                  | 106                  | 75                   | 168                  |
| hsa-miR-505_star  | 41                     |                         |                      |                      | 35                   | 61                   |
| hsa-miR-511       | 32                     |                         |                      |                      | 6                    |                      |
| hsa-miR-517a      |                        |                         |                      |                      | 6                    |                      |
| hsa-miR-532-3p    | 298                    |                         |                      |                      | 43                   | 104                  |
| hsa-miR-532-5p    | 3531                   |                         | 444                  | 799                  | 1859                 | 2731                 |
| hsa-miR-539       | 71                     |                         |                      |                      | 24                   | 32                   |
| hsa-miR-542-3p    | 81                     |                         |                      | 229                  | 75                   | 280                  |
| hsa-miR-542-5p    | 32                     |                         |                      | 59                   | 16                   | 118                  |
| hsa-miR-543       | 325                    |                         |                      | 62                   | 12                   | 144                  |
| hsa-miR-545       | 7                      |                         |                      | 58                   | 7                    |                      |
| hsa-miR-545_star  |                        |                         |                      |                      | 5                    |                      |
| hsa-miR-548aa     | 55                     |                         | 183                  |                      | 40                   | 92                   |
| hsa-miR-548d-3p   | 6                      |                         |                      |                      |                      |                      |
| hsa-miR-548v      |                        |                         |                      |                      |                      | 15                   |
| hsa-miR-549       | 8                      |                         |                      |                      | 7                    | 15                   |
| hsa-miR-550a      | 37                     |                         |                      |                      | 33                   | 26                   |
| hsa-miR-550a_star | 62                     |                         |                      |                      | 39                   | 18                   |
| hsa-miR-551a      | 9                      |                         |                      |                      |                      |                      |
| hsa-miR-551b      | 37                     |                         |                      |                      | 57                   | 9                    |
| hsa-miR-570       |                        |                         |                      |                      | 15                   |                      |
| hsa-miR-574-3p    | 23109                  |                         | 6671                 | 1719                 | 8232                 | 22557                |
| hsa-miR-574-5p    | 1098                   |                         | 2898                 | 596                  | 1762                 | 266                  |
| hsa-miR-576-5p    | 15                     |                         |                      |                      | 22                   | 9                    |
| hsa-miR-579       |                        |                         |                      |                      | 5                    |                      |
| hsa-miR-582-5p    | 14                     |                         |                      |                      | 11                   |                      |
| hsa-miR-584       | 16                     |                         |                      |                      | 5                    |                      |
| hsa-miR-589       | 9                      |                         |                      |                      | 7                    |                      |
| hsa-miR-589_star  | 12                     |                         |                      |                      | 20                   | 15                   |
| hsa-miR-590-3p    | 157                    |                         | 189                  |                      | 185                  | 254                  |
| hsa-miR-590-5p    | 125                    |                         | 210                  | 504                  | 396                  | 227                  |
| hsa-miR-598       | 41                     |                         |                      | 131                  | 7                    | 76                   |
| hsa-miR-616       |                        |                         |                      |                      | 5                    |                      |
| hsa-miR-616_star  | 11                     |                         |                      |                      | 5                    | 16                   |
| hsa-miR-618       | 7                      |                         |                      |                      |                      |                      |
| hsa-miR-624_star  | 16                     |                         |                      |                      | 7                    |                      |
| hsa-miR-625       | 9                      |                         |                      |                      | 12                   | 73                   |
| hsa-miR-625_star  | 94                     |                         |                      |                      | 43                   | 165                  |
| hsa-miR-627       | 25                     |                         |                      |                      | 70                   | 15                   |
| hsa-miR-628-3p    | 12                     |                         |                      |                      | 7                    | 31                   |
| hsa-miR-628-5p    | 52                     |                         |                      |                      | 100                  | 378                  |
| hsa-miR-629       | 33                     |                         |                      |                      | 18                   | 28                   |
| hsa-miR-629_star  |                        |                         |                      |                      |                      | 8                    |
| hsa-miR-636       |                        |                         |                      |                      | 6                    |                      |
| hsa-miR-641       | 9                      |                         |                      |                      | 16                   | 31                   |
| hsa-miR-642a      |                        |                         |                      |                      |                      | 15                   |
| hsa-miR-642b      |                        |                         |                      |                      |                      | 16                   |
| hsa-miR-652       | 13                     |                         |                      |                      |                      | 14                   |
| hsa-miR-654-3p    | 596                    |                         | 201                  | 409                  | 111                  | 488                  |
| hsa-miR-655       | 71                     |                         |                      | 40                   | 47                   | 72                   |

| miRNA              | P no. 16<br>NN | P no. 23*<br>NN | P no. 2<br>N | P no. 2<br>T | P no. 1<br>N | P no. 1<br>T |
|--------------------|----------------|-----------------|--------------|--------------|--------------|--------------|
| hsa-miR-656        | 44             |                 |              |              | 9            | 27           |
| hsa-miR-660        | 331            |                 |              | 712          | 266          | 161          |
| hsa-miR-664        | 238            |                 |              | 53           | 113          | 395          |
| hsa-miR-664_star   | 26             |                 |              |              | 41           | 24           |
| hsa-miR-671-3p     | 52             |                 |              |              | 5            | 72           |
| hsa-miR-671-5p     | 40             |                 |              | 157          | 215          | 53           |
| hsa-miR-675        | 13             |                 |              |              | 5            |              |
| hsa-miR-7          | 102            |                 | 273          | 72           | 57           | 43           |
| hsa-miR-7-1_star   | 78             |                 |              | 40           | 99           | 85           |
| hsa-miR-7-2_star   | 10             |                 |              |              | 5            | 12           |
| hsa-miR-708        | 512            |                 | 222          | 642          | 449          | 317          |
| hsa-miR-708_star   | 11             |                 |              |              | 34           | 9            |
| hsa-miR-720        | 442            |                 | 914          | 142          | 51           | 173          |
| hsa-miR-744        | 413            |                 |              | 163          | 148          | 551          |
| hsa-miR-744_star   | 11             |                 |              |              | 11           | 22           |
| hsa-miR-766        | 99             |                 |              | 46           | 23           | 297          |
| hsa-miR-769-3p     | 30             |                 |              |              | 19           | 13           |
| hsa-miR-769-5p     | 38             |                 |              | 44           | 56           | 63           |
| hsa-miR-873        |                |                 |              | 54           | 32           | 181          |
| hsa-miR-874        | 839            |                 | 198          | 86           | 371          | 822          |
| hsa-miR-876-3p     |                |                 |              |              | 10           | 27           |
| hsa-miR-876-5p     |                |                 |              |              | 16           | 166          |
| hsa-miR-877        |                |                 |              |              | 19           |              |
| hsa-miR-877_star   | 10             |                 |              |              | 11           | 33           |
| hsa-miR-887        | 230            |                 |              | 268          | 376          | 451          |
| hsa-miR-889        | 11             |                 |              |              |              |              |
| hsa-miR-9          |                |                 |              |              | 8            |              |
| hsa-miR-92a        | 4400           |                 | 4846         | 2969         | 2466         | 1701         |
| hsa-miR-92a-1_star |                |                 |              |              | 6            | 7            |
| hsa-miR-92b        | 297            |                 |              | 45           | 141          | 246          |
| hsa-miR-92b_star   | 12             |                 |              |              | 14           | 15           |
| hsa-miR-93         | 500            |                 | 336          | 1448         | 1339         | 185          |
| hsa-miR-93_star    | 101            |                 |              | 102          | 41           | 86           |
| hsa-miR-935        | 27             |                 |              |              | 17           | 65           |
| hsa-miR-940        | 58             |                 |              |              | 7            | 23           |
| hsa-miR-941        | 32             |                 |              |              | 20           | 14           |
| hsa-miR-95         | 153            |                 |              |              | 31           | 84           |
| hsa-miR-96         | 49             |                 |              |              | 21           |              |
| hsa-miR-98         | 244            |                 | 1489         | 1091         | 467          | 915          |
| hsa-miR-99a        | 7707           | 31841           | 13690        | 74329        | 15968        | 12215        |
| hsa-miR-99a_star   | 270            |                 |              |              | 254          | 335          |
| hsa-miR-99b        | 2070           |                 | 423          | 81           | 1642         | 3558         |
| hsa-miR-99b_star   | 222            |                 |              | 108          | 57           | 255          |

\* This patient sample NN Dura was used for sequencing, but not for validation by RT-qPCR

**Table S2c.** Global comparisons of all expressed miRNAs between grades I and II meningioma as well as between dura controls N (patient with a tumor grade I or II) and NN (patient without tumors).

| <b>Sample</b>                                                                        | <b>T-TEST</b> |
|--------------------------------------------------------------------------------------|---------------|
| Grade I vs. Grade II                                                                 | 0,9809        |
| Normal (N) (from patient with grade I) vs<br>Normal (N) (from patient with grade II) | 0,7027        |
| Normal (NN) vs Normal (N) (from<br>patient with grade II)                            | 0,9315        |
| Normal (N) (from patient with grade I) vs<br>Normal (NN)                             | 0,6953        |
| Normal (N) (from patient with grade I) vs<br>Tumor (Grade I)                         | 0,9479        |
| Normal N (from patient with grade II) vs<br>Tumor (Grade II)                         | 0,7192        |

**Table S3a.** miRNA RT-qPCR analysis. The  $\Delta\Delta Cq$  method was used to calculate all the fold changes and the Student's t-test (two tailed) was used to calculate all the p-values.

| Patient | Grade | miR-574-3p | let-7g | miR-17 | miR-26b | miR-218 | miR-376c | miR-34a | miR-342-3p | miR-424 | miR-143 | miR-130a | miR-152 | miR-199a-5p | miR-99a | miR-148b | miR-193b | miR-451 | miR-21 | miR-200a |
|---------|-------|------------|--------|--------|---------|---------|----------|---------|------------|---------|---------|----------|---------|-------------|---------|----------|----------|---------|--------|----------|
| 2       | II    | -0,798     | -4,728 | 2,153  | -1,618  | -0,968  | 0,500    | -3,999  | -1,198     | -3,169  | -2,278  | -0,343   | -2,261  | -1,886      | -3,653  | -0,900   | 1,708    | -4,225  | -3,074 | 7,256    |
| 1       | I     | -0,497     | -4,365 | 2,097  | -2,875  | -2,311  | 1,207    | -3,202  | -0,025     | -3,066  | -2,612  | -0,715   | -1,237  | -1,681      | -2,684  | 0,267    | 0,833    | -4,358  | -1,908 | 8,133    |
| 3       | II    | -0,376     | -4,341 | 2,596  | -2,192  | -0,925  | 1,041    | -3,786  | -0,184     | -2,627  | -1,931  | -0,975   | -1,722  | -3,354      | -3,196  | -0,494   | 1,448    | -3,651  | -2,041 | 8,636    |
| 4       | I     | -0,546     | -4,912 | 2,402  | -1,873  | -1,731  | -1,770   | -4,046  | -1,016     | -4,412  | -4,213  | -0,644   | -2,893  | -0,881      | -2,225  | -1,093   | -1,778   | -4,241  | -3,030 | 10,548   |
| 5       | I     | -1,248     | -4,696 | 2,281  | -2,074  | -1,015  | 0,481    | -3,789  | -0,957     | -1,933  | -2,769  | -0,746   | -2,580  | -3,468      | -3,728  | -0,660   | 0,063    | -5,828  | -2,905 | 8,502    |
| 6       | II    | -0,449     | -4,366 | 2,485  | -2,540  | -0,828  | 2,229    | -1,521  | 0,752      | -1,336  | -2,821  | -0,551   | -2,168  | -2,245      | -3,753  | -0,715   | -0,831   | -4,742  | -5,433 | 8,956    |
| 7       | I     | 0,036      | -4,010 | 3,360  | -2,530  | -3,007  | 0,831    | -3,543  | 0,190      | -4,514  | -2,855  | 0,597    | -1,727  | -1,027      | -2,411  | -0,156   | -1,506   | -5,742  | -3,299 | 7,560    |
| 8       | I     | -1,343     | -4,429 | 2,564  | -2,049  | -1,376  | 0,297    | -3,365  | -0,920     | -2,411  | -2,821  | -0,985   | -2,126  | -3,040      | -4,174  | 0,009    | 0,967    | -2,612  | -2,733 | 7,690    |
| 9       | I     | -1,415     | -4,476 | 2,640  | -1,957  | -0,923  | 0,921    | -3,635  | -0,619     | -2,442  | -2,472  | -0,280   | -2,547  | -3,348      | -4,369  | -0,590   | -0,104   | -2,447  | -3,008 | 8,088    |
| 10      | I     | 0,670      | -4,118 | 2,453  | -2,119  | -1,452  | 2,085    | -2,394  | 0,654      | -1,927  | -2,396  | -0,611   | -1,825  | 1,100       | -1,937  | -0,261   | -0,166   | -4,494  | -3,780 | 9,501    |
| 11      | I     | 0,030      | -3,988 | 1,977  | -2,078  | -0,783  | 2,731    | -1,219  | -0,277     | -4,284  | -3,246  | 0,451    | -2,082  | -2,068      | -3,677  | 0,149    | 0,316    | -6,460  | -3,200 | 8,863    |
| 12      | I     | -1,429     | -4,522 | 2,516  | -1,816  | -0,971  | -0,173   | -3,194  | -0,919     | -3,336  | -2,823  | -1,165   | -2,659  | -3,193      | -5,062  | -0,771   | 2,106    | -3,292  | -3,719 | 7,043    |
| 13      | I     | -1,123     | -4,883 | 1,249  | -2,582  | -3,275  | 1,277    | -3,254  | -0,792     | -2,762  | -4,278  | -0,091   | -1,873  | -3,226      | -2,726  | -0,286   | -0,610   | -5,643  | -2,732 | 7,815    |
| 14      | I     | -0,625     | -3,033 | 3,358  | -1,051  | -0,407  | 1,002    | -2,827  | -0,357     | -1,122  | -1,435  | 0,181    | -1,380  | -2,959      | -3,773  | 1,027    | -0,066   | -0,643  | -1,075 | 9,233    |
| 15      | I     | -1,000     | -3,775 | 2,427  | -2,096  | 2,782   | 1,948    | -1,492  | 0,080      | -1,911  | -5,464  | 1,720    | -1,230  | -4,321      | -4,676  | 0,724    | -3,150   | -8,902  | -4,134 | 5,385    |
| 9       | N     | -1,162     | -4,516 | 1,041  | -2,043  | 1,025   | 2,113    | -0,716  | -0,135     | -1,361  | -4,297  | 1,184    | -1,143  | -2,993      | -4,137  | 0,254    | -2,717   | -9,711  | -4,156 | 8,309    |
| 10      | N     | -0,805     | -4,221 | 1,076  | -2,060  | 0,777   | 1,485    | -2,005  | -0,002     | -1,755  | -4,956  | 0,662    | -0,783  | -3,115      | -2,508  | 0,216    | -1,882   | -9,131  | -4,943 | 9,147    |
| 13      | N     | -1,074     | -3,869 | 1,679  | -2,142  | 1,227   | 1,610    | -0,942  | -0,157     | -1,637  | -5,328  | 0,663    | -1,097  | -3,175      | -3,979  | 0,520    | -2,441   | -8,364  | -4,246 | 7,660    |
| 15      | N     | -1,049     | -4,007 | 1,343  | -2,136  | 1,135   | 1,595    | -0,979  | -0,104     | -2,185  | -5,153  | 0,880    | -0,769  | -3,024      | -4,002  | 0,449    | -2,276   | -8,864  | -4,467 | 8,629    |
| 16      | NN    | -1,092     | -4,043 | 1,734  | -1,059  | 0,913   | 0,350    | -2,208  | -0,482     | -2,548  | -4,826  | 1,089    | -0,565  | -2,708      | -1,969  | 0,340    | -1,054   | -7,385  | -7,004 | 8,561    |

|             |          |         |                 |         |                |         |                |         |         |                 |                |         |          |         |         |                 |                  |                 |         |
|-------------|----------|---------|-----------------|---------|----------------|---------|----------------|---------|---------|-----------------|----------------|---------|----------|---------|---------|-----------------|------------------|-----------------|---------|
| Average T   | -0,67    | -4,31   | 2,44            | -2,10   | -1,15          | 0,97    | -3,02          | -0,37   | -2,75   | -2,96           | -0,28          | -2,02   | -2,37    | -3,47   | -0,25   | -0,05           | -4,49            | -3,07           | 8,21    |
| Average N   | -1,04    | -4,13   | 1,37            | -1,89   | 1,02           | 1,43    | -1,37          | -0,18   | -1,90   | -4,91           | 0,90           | -0,87   | -3,00    | -3,32   | 0,36    | -2,07           | -8,69            | -4,96           | 8,46    |
| Fold Change | -1,28562 | 1,13160 | <b>-2,08868</b> | 1,15565 | <b>4,47300</b> | 1,37223 | <b>3,13323</b> | 1,14613 | 1,80630 | <b>-3,86719</b> | <b>2,25423</b> | 2,21845 | -1,54752 | 1,11004 | 1,52157 | <b>-4,06329</b> | <b>-18,45249</b> | <b>-3,71039</b> | 1,18696 |
| P-value     | 0,21164  | 0,44390 | <b>0,00040</b>  | 0,37653 | <b>0,00280</b> | 0,39450 | <b>0,00208</b> | 0,49589 | 0,10305 | <b>0,00060</b>  | <b>0,00356</b> | 0,00016 | 0,32484  | 0,76006 | 0,04109 | <b>0,00658</b>  | <b>0,00021</b>   | <b>0,00267</b>  | 0,66813 |
| Std.av T    | 0,610    | 0,482   | 0,510           | 0,440   | 1,369          | 1,095   | 0,939          | 0,614   | 1,061   | 1,010           | 0,758          | 0,517   | 1,363    | 0,921   | 0,600   | 1,404           | 1,944            | 1,013           | 1,212   |
| Std.av N    | 0,136    | 0,249   | 0,325           | 0,465   | 0,178          | 0,651   | 0,684          | 0,181   | 0,470   | 0,393           | 0,240          | 0,243   | 0,180    | 1,006   | 0,128   | 0,645           | 0,877            | 1,181           | 0,542   |
| Max T       | 0,670    | -3,033  | 3,360           | -1,051  | 2,782          | 2,731   | -1,219         | 0,752   | -1,122  | -1,435          | 1,720          | -1,230  | 1,100    | -1,937  | 1,027   | 2,106           | -0,643           | -1,075          | 10,548  |
| Min T       | -1,429   | -4,912  | 1,249           | -2,875  | -3,275         | -1,770  | -4,046         | -1,198  | -4,514  | -5,464          | -1,165         | -2,893  | -4,321   | -5,062  | -1,093  | -3,150          | -8,902           | -5,433          | 5,385   |
| Max N       | -0,805   | -3,869  | 1,734           | -1,059  | 1,227          | 2,113   | -0,716         | -0,002  | -1,361  | -4,297          | 1,184          | -0,565  | -2,708   | -1,969  | 0,520   | -1,054          | -7,385           | -4,156          | 9,147   |
| Min N       | -1,162   | -4,516  | 1,041           | -2,142  | 0,777          | 0,350   | -2,208         | -0,482  | -2,548  | -5,328          | 0,662          | -1,143  | -3,175   | -4,137  | 0,216   | -2,717          | -9,711           | -7,004          | 7,660   |

**Table S3b.** Relative expression of microRNAs of grade I versus grade II for the miRs that exhibited differential expression between tumors versus controls as shown in Table 3. Fold change between grades I and II and the p-values are shown. The  $\Delta\Delta Cq$  method was used to calculate all the fold changes and the Student's t-test (two tailed) was used to calculate all the p-values.

|                         | <b>miR-21</b> | <b>miR-34a</b> | <b>miR-143</b> | <b>miR-193b</b> | <b>miR-218</b> |
|-------------------------|---------------|----------------|----------------|-----------------|----------------|
| Average Grade I         | -2,96         | -3,00          | -3,12          | -0,26           | -1,21          |
| Average Grade II        | -3,52         | -3,10          | -2,34          | 0,77            | -0,91          |
| Fold Change, I vs<br>II | -1,47         | -1,08          | 1,71           | 2,05            | 1,23           |
| *P-value                | 0,768         | 0,839          | 0,986          | 0,809           | 0,471          |

\*No significant difference between grade I and grade II in microRNA expression reported in Table 3.

**Table S4a.** Initial RT-qPCR mRNA data analysis of meningiomas compared to control. The  $\Delta\Delta Cq$  method was used to calculate all the fold changes and the Student's t-test (two tailed) was used to calculate all the p-values.

| Patient     | Grade | ACVR1C  | CCNG1    | E2F5     | MTOR     | PTEN_AB         | RICTOR          | RUNX1T1         | SIRT1           | TP53-FAM        | TP63          |
|-------------|-------|---------|----------|----------|----------|-----------------|-----------------|-----------------|-----------------|-----------------|---------------|
| 2           | II    | NA      | 0,856    | 6,488    | 4,707    | 6,067           | 5,989           | 10,598          | 6,216           | 3,821           | 5,688         |
| 1           | I     | NA      | 1,286    | 6,369    | 5,825    | 6,961           | 7,000           | 9,597           | 5,677           | 4,289           | 4,300         |
| 3           | II    | NA      | 1,792    | 7,189    | 5,730    | 6,681           | 6,952           | 10,102          | 5,972           | 4,914           | 6,222         |
| 4           | I     | NA      | 2,263    | 5,411    | 6,225    | 7,083           | 6,029           | 7,488           | 5,725           | 4,078           | 4,013         |
| 5           | I     | NA      | 1,747    | 6,738    | 5,886    | 7,096           | 6,865           | 7,797           | 6,497           | 4,474           | 11,263        |
| 6           | II    | NA      | 4,260    | 6,266    | 7,249    | 9,289           | 7,706           | NA              | 8,188           | 4,622           | 2,858         |
| 7           | I     | 11,008  | 1,638    | 6,585    | 5,821    | 6,437           | 7,480           | 10,454          | 6,809           | 5,194           | 6,121         |
| 8           | I     | 12,643  | 0,732    | 5,643    | 6,160    | 6,512           | 6,347           | 7,564           | 5,925           | 5,436           | 9,613         |
| 9           | I     | NA      | 2,685    | 6,641    | 5,983    | 6,279           | 6,698           | 9,402           | 5,823           | 5,160           | 8,523         |
| 10          | I     | NA      | 1,531    | 5,411    | 5,983    | 5,776           | 6,725           | 10,230          | 6,590           | 4,066           | 4,059         |
| 11          | I     | NA      | 1,195    | 5,535    | 6,237    | 5,913           | 6,577           | NA              | 6,343           | 3,818           | 3,816         |
| 12          | I     | NA      | 1,918    | 6,565    | 6,818    | 6,632           | 6,245           | 10,648          | 6,289           | 4,632           | 4,863         |
| 13          | I     | NA      | 1,871    | 6,464    | 6,211    | 6,402           | 6,695           | 8,793           | 6,572           | 5,373           | 4,643         |
| 14          | I     | NA      | 3,971    | 7,023    | 6,845    | 6,946           | 7,375           | NA              | 7,636           | 3,253           | NA            |
| 15          | I     | NA      | 2,556    | 7,428    | 6,037    | 5,694           | 6,822           | 10,926          | 6,516           | 4,287           | 6,604         |
| 9           | N     | NA      | NA       | NA       | NA       | NA              | NA              | NA              | NA              | NA              | NA            |
| 10          | N     | NA      | 1,016    | NA       | NA       | NA              | NA              | NA              | NA              | 2,436           | NA            |
| 13          | N     | NA      | 2,140    | 5,576    | 5,295    | 5,036           | 5,090           | 6,661           | 4,678           | 3,809           | NA            |
| 15          | N     | NA      | 0,841    | 4,565    | NA       | NA              | 5,098           | NA              | NA              | 3,020           | NA            |
| 16          | NN    | NA      | 2,719    | 6,344    | 5,570    | 5,607           | 6,612           | 8,161           | 7,488           | 3,638           | NA            |
| Average T   |       | 11,83   | 2,02     | 6,38     | 6,11     | 6,65            | 6,77            | 9,47            | 6,45            | 4,49            | 5,90          |
| Average N   |       | #DIV/0! | 1,68     | 5,49     | 5,43     | 5,32            | 5,60            | 7,41            | 6,08            | 3,23            | #DIV/0!       |
| Fold Change |       | #DIV/0! | -1,26684 | -1,85182 | -1,60408 | <b>-2,51336</b> | <b>-2,24544</b> | <b>-4,15693</b> | <b>-1,29144</b> | <b>-2,40909</b> | #DIV/0!       |
| P-value     |       | #DIV/0! | 0,55024  | 0,05237  | 0,12956  | <b>0,05218</b>  | <b>0,00465</b>  | <b>0,05201</b>  | <b>0,56949</b>  | <b>0,00249</b>  | #DIV/0!       |
| Std.av T    |       | 4,172   | 1,014    | 0,633    | 0,582    | 0,860           | 0,500           | 4,076           | 0,692           | 0,638           | 2,782         |
| Std.av N    |       | 0,000   | 1,083    | 3,075    | 2,977    | 2,922           | 3,129           | 4,094           | 3,477           | 1,541           | 0,000         |
| Max T       |       | 12,643  | 4,260    | 7,428    | 7,249    | 9,289           | 7,706           | 10,926          | 8,188           | 5,436           | <b>11,263</b> |
| Min T       |       | 11,008  | 0,732    | 5,411    | 4,707    | 5,694           | 5,989           | 7,488           | 5,677           | 3,253           | <b>2,858</b>  |
| Max N       |       | 0,000   | 2,719    | 6,344    | 5,570    | 5,607           | 6,612           | 8,161           | 7,488           | 3,809           | <b>0,000</b>  |
| Min N       |       | 0,000   | 0,841    | 4,565    | 5,295    | 5,036           | 5,090           | 6,661           | 4,678           | 2,436           | <b>0,000</b>  |



**Table S4b.** Grade I vs Grade II in the Initial RT-qPCR mRNA data analysis of meningiomas grade I compared to grade II did not reveal a significant differences in the tested mRNAs using one reference gene. The  $\Delta\Delta Cq$  method was used to calculate all the fold changes and the Student's t-test (two tailed) was used to calculate all the p-values.

| Patient         | Grade | ACVR1C  | CCNG1   | E2F5    | MTOR     | PTEN_AB | RICTOR  | RUNX1T1 | SIRT1   | TP53-FAM | TP63     |
|-----------------|-------|---------|---------|---------|----------|---------|---------|---------|---------|----------|----------|
| 1               | I     | NA      | 1,286   | 6,369   | 5,825    | 6,961   | 7,000   | 9,597   | 5,677   | 4,289    | 4,300    |
| 4               | I     | NA      | 2,263   | 5,411   | 6,225    | 7,083   | 6,029   | 7,488   | 5,725   | 4,078    | 4,013    |
| 5               | I     | NA      | 1,747   | 6,738   | 5,886    | 7,096   | 6,865   | 7,797   | 6,497   | 4,474    | 11,263   |
| 7               | I     | 11,008  | 1,638   | 6,585   | 5,821    | 6,437   | 7,480   | 10,454  | 6,809   | 5,194    | 6,121    |
| 8               | I     | 12,643  | 0,732   | 5,643   | 6,160    | 6,512   | 6,347   | 7,564   | 5,925   | 5,436    | 9,613    |
| 9               | I     | NA      | 2,685   | 6,641   | 5,983    | 6,279   | 6,698   | 9,402   | 5,823   | 5,160    | 8,523    |
| 11              | I     | NA      | 1,195   | 5,535   | 6,237    | 5,913   | 6,577   | NA      | 6,343   | 3,818    | 3,816    |
| 12              | I     | NA      | 1,918   | 6,565   | 6,818    | 6,632   | 6,245   | 10,648  | 6,289   | 4,632    | 4,863    |
| 13              | I     | NA      | 1,871   | 6,464   | 6,211    | 6,402   | 6,695   | 8,793   | 6,572   | 5,373    | 4,643    |
| 14              | I     | NA      | 3,971   | 7,023   | 6,845    | 6,946   | 7,375   | NA      | 7,636   | 3,253    | NA       |
| 2               | II    | NA      | 0,856   | 6,488   | 4,707    | 6,067   | 5,989   | 10,598  | 6,216   | 3,821    | 5,688    |
| 3               | II    | NA      | 1,792   | 7,189   | 5,730    | 6,681   | 6,952   | 10,102  | 5,972   | 4,914    | 6,222    |
| 6               | II    | NA      | 4,260   | 6,266   | 7,249    | 9,289   | 7,706   | NA      | 8,188   | 4,622    | 2,858    |
| 10              | #REF! | NA      | 1,531   | 5,411   | 5,983    | 5,776   | 6,725   | 10,230  | 6,590   | 4,066    | 4,059    |
| 15              | #REF! | NA      | 2,556   | 7,428   | 6,037    | 5,694   | 6,822   | 10,926  | 6,516   | 4,287    | 6,604    |
| 9               | N     | NA      | NA      | NA      | NA       | NA      | NA      | NA      | NA      | NA       | NA       |
| 10              | N     | NN      | 1.016   | NA      | NA       | NA      | NA      | NA      | NA      | 2,436    | NA       |
| 13              | N     | NA      | 2,140   | 5,576   | 5,295    | 5,036   | 5,090   | 6,661   | 4,678   | 3,809    | NA       |
| 15              | N     | NA      | 0,841   | 4,565   | NA       | NA      | 5,098   | NA      | NA      | 3,020    | NA       |
| 16              | NN    | NA      | 2,719   | 6,344   | 5,570    | 5,607   | 6,612   | 8,161   | 7,488   | 3,638    | NA       |
| Average Grade 1 |       | 11,83   | 1,93    | 6,30    | 6,20     | 6,63    | 6,73    | 8,97    | 6,33    | 4,57     | 6,35     |
| Average Grade 2 |       | #DIV/0! | 2,30    | 6,65    | 5,90     | 7,35    | 6,88    | 10,35   | 6,79    | 4,45     | 4,92     |
| Fold Change     |       | #DIV/0! | 1,29447 | 1,27469 | -1,23575 | 1,64623 | 1,11056 | 2,60631 | 1,37773 | -1,08578 | -2,69014 |
| P-value         |       | #DIV/0! | 0,62028 | 0,35122 | 0,48352  | 0,20479 | 0,68939 | 0,17950 | 0,36915 | 0,80175  | 0,42836  |
| Std.av Grade 1  |       | 5,001   | 0,904   | 0,560   | 0,370    | 0,391   | 0,468   | 3,942   | 0,599   | 0,728    | 3,284    |
| Std.av Grade 2  |       | 0,000   | 1,758   | 0,482   | 1,279    | 1,711   | 0,860   | 5,981   | 1,215   | 0,566    | 1,808    |
| Max Grade 1     |       | 12,643  | 2,685   | 6,738   | 6,818    | 7,096   | 7,480   | 10,648  | 6,809   | 5,436    | 11,263   |
| Min Grade 1     |       | 11,008  | 0,732   | 5,411   | 5,821    | 5,913   | 6,029   | 7,488   | 5,677   | 3,253    | 3,816    |
| Max Grade 2     |       | 0,000   | 4,260   | 7,189   | 7,249    | 9,289   | 7,706   | 10,598  | 8,188   | 4,914    | 6,222    |
| Min Grade 2     |       | 0,000   | 0,856   | 6,266   | 4,707    | 6,067   | 5,989   | 10,102  | 5,972   | 3,821    | 2,858    |

**Table S5a.** RT-qPCR re-evaluation of 6 mRNA differential expression (Tumors versus control) with three reference genes. The  $\Delta\Delta Cq$  method was used to calculate all the fold changes and the Student's t-test (two tailed) was used to calculate all the p-values.

| Patient, grade | p63    | E-cadherin | PTEN  | RICTOR | p53   | RUNX1T1 |
|----------------|--------|------------|-------|--------|-------|---------|
| 2, II          | 6,603  | 3,047      | 4,454 | 6,569  | 5,613 | 12,186  |
| 1, I           | 4,279  | 1,274      | 3,053 | 4,183  | 2,309 | 10,034  |
| 3, II          | 5,028  | 1,250      | 2,074 | 4,271  | 3,838 | 10,997  |
| 4, I           | 3,996  | 2,458      | 3,979 | 5,154  | 2,977 | 8,930   |
| 5, I           | 11,047 | 1,399      | 2,850 | 4,347  | 2,752 | 8,277   |
| 6, II          | 2,662  | -1,698     | 1,861 | 6,068  | 3,528 | 12,226  |
| 7, I           | 6,859  | 0,387      | 2,593 | 5,367  | 3,848 | 12,490  |
| 8, I           | 10,271 | 2,697      | 3,623 | 3,696  | 1,849 | 10,370  |
| 9, I           | 8,742  | 1,698      | 3,678 | 6,072  | 3,428 | 10,024  |
| 10, I          | 4,160  | 2,214      | 3,813 | 5,801  | 4,023 | 10,927  |
| 11, I          | 5,606  | 3,273      | 4,938 | 6,774  | 5,041 | 9,996   |
| 12, I          | 5,556  | 1,470      | 3,423 | 5,696  | 3,728 | 11,401  |
| 13, I          | 3,335  | 1,909      | 3,991 | 6,140  | 4,369 | 9,347   |
| 15, I          | 5,271  | 0,564      | 2,983 | 5,211  | 3,349 | 9,093   |
| 10, N          | 7,640  | 5,839      | 7,310 | 7,945  | 5,460 | 12,132  |
| 13, N          | 8,481  | 3,870      | 4,293 | 4,476  | 3,150 | 7,630   |
| 15, N          | 8,877  | 3,978      | 5,451 | 6,392  | 4,180 | 7,502   |
| 16, NN         | 11,185 | 7,723      | 6,630 | 5,986  | 4,421 | 6,651   |

|             |                |                 |                |         |         |                 |
|-------------|----------------|-----------------|----------------|---------|---------|-----------------|
| Average T   | 5,96           | 1,57            | 3,38           | 5,38    | 3,62    | 10,45           |
| Average N   | 8,46           | 5,31            | 5,87           | 5,93    | 4,21    | 8,58            |
| Fold Change | <b>5,67074</b> | <b>13,42920</b> | <b>5,63336</b> | 1,45946 | 1,50606 | <b>-3,65870</b> |
| P-value     | <b>0,04448</b> | <b>0,00007</b>  | <b>0,00004</b> | 0,29833 | 0,21273 | <b>0,02125</b>  |
| STD T       | 2,523          | 1,271           | 0,870          | 0,953   | 0,999   | 1,313           |
| STD N       | 1,938          | 1,971           | 1,136          | 1,249   | 0,754   | 1,958           |
| Max T       | 11,047         | 3,273           | 4,938          | 6,774   | 5,613   | 12,490          |
| Min T       | 2,662          | -1,698          | 1,861          | 3,696   | 1,849   | 8,277           |
| Max N       | 11,185         | 7,723           | 7,310          | 7,945   | 5,460   | 12,132          |
| Min N       | 7,640          | 3,870           | 4,293          | 4,476   | 3,150   | 6,651           |

**Table S5b.** Relative expression of mRNA of grade I versus grade II for the mRNAs presented in Table 4 for the differential expression between tumors versus controls. Fold change between grades I and II and the p-values are shown. The  $\Delta\Delta Cq$  method was used to calculate all the fold changes and the Student's t-test (two tailed) was used to calculate all the p-values.

|                       | <b>p63</b> | <b>E-cadherin</b> | <b>PTEN</b> | <b>RICTOR</b> | <b>p53</b> | <b>RUNX1T1</b> |
|-----------------------|------------|-------------------|-------------|---------------|------------|----------------|
| Average Grade I       | 6,28       | 1,76              | 3,54        | 5,31          | 3,42       | 10,08          |
| Average Grade II      | 4,76       | 0,87              | 2,80        | 5,64          | 4,33       | 11,80          |
| Fold Change, I vs. II | -2,87      | -1,86             | -1,67       | 1,25          | 1,87       | 3,30           |
| *P-value              | 0,376      | 0,299             | 0,201       | 0,622         | 0,175      | 0,038          |

\* No significance between grade I and II in mRNA expression reported in Table 4 with the exception of RUNX1T1.

**Table S6.** RNA integrity number (RIN) for used meningioma and Dora (N, NN) samples.

| <b>Patient no.</b> | <b>Sample Type</b> | <b>RIN Vales</b> |
|--------------------|--------------------|------------------|
| 1                  | T                  | 9,1              |
| 2                  | T                  | 8.4              |
| 3                  | T                  | 9.1              |
| 4                  | T                  | 7.5              |
| 5                  | T                  | 8.6              |
| 6                  | T                  | 7.7              |
| 7                  | T                  | 7.7              |
| 8                  | T                  | 8.7              |
| 9                  | T                  | 8.8              |
| 10                 | T                  | 9.1              |
| 11                 | T                  | 8.3              |
| 12                 | T                  | 7.4              |
| 13                 | T                  | 8.0              |
| 14                 | T                  | 8.7              |
| 15                 | T                  | 7.8              |
| 9                  | N                  | 6.8              |
| 10                 | N                  | 6.7              |
| 13                 | N                  | 6.6              |
| 15                 | N                  | 6.9              |
| 16                 | NN                 | 7.1              |

**Table S7.** RT-qPCR validation-primers for miRNA expression (Exiqon A/S, 2950 Vedbaek, Denmark).

| <b>miRNA</b>    | <b>Target sequence</b>  | <b>Catalog number</b> |
|-----------------|-------------------------|-----------------------|
| hsa-miR-122     | UGGAGUGUGACAAUGGUGUUUG  | 204090                |
| hsa-miR-574-3p  | CACGCUCAUGCACACACCCACA  | 204365                |
| hsa-let-7g      | UGAGGUAGUAGUUUGUACAGUU  | 204565                |
| hsa-miR-17      | CAAAGUGCUUACAGUGCAGGUAG | 204771                |
| hsa-miR-26b     | UUCAAGUAAUUCAGGAUAGGU   | 204172                |
| hsa-miR-218     | UUGUGCUUGAUCUAACCAUGU   | 204484                |
| hsa-miR-376c    | AACAUAGAGGAAAUUCCACGU   | 204442                |
| hsa-miR-34a     | UGGCAGUGUCUUAGCUGGUUGU  | 204486                |
| hsa-miR-342-3p  | UCUCACACAGAAAUCGCACCCGU | 204511                |
| hsa-miR-424     | CAGCAGCAAUUCAUGUUUUGAA  | 204736                |
| hsa-miR-143     | UGAGAUGAAGCACUGUAGCUC   | 204190                |
| hsa-miR-130a    | CAGUGCAAUGUUAAAAGGGCAU  | 204658                |
| hsa-miR-152     | UCAGUGCAUGACAGAACUUGG   | 204294                |
| hsa-miR-199a-5p | CCCAGUGUUCAGACUACCGUUC  | 204494                |
| hsa-miR-99a     | AACCCGUAGAUCCGAUCUUGUG  | 204521                |
| hsa-miR-148b    | UCAGUGCAUCACAGAACUUUGU  | 204047                |
| hsa-miR-193b    | AACUGGCCCUCAAAGUCCCGCU  | 204226                |
| hsa-miR-451     | AAACCGUUACCAUACUGAGUU   | 204734                |
| hsa-miR-21      | UAGCUUAUCAGACUGAUGUUGA  | 204230                |
| hsa-miR-200a    | UAACACUGUCUGGUAACGAUGU  | 204707                |
| hsa-miR-191     | CAACGGAAUCCCAAAGCAGCUG  | 204306                |
| hsa-miR-16      | UAGCAGCACGUAAAUAUUGGCG  | 204409                |
| hsa-let-7a      | UGAGGUAGUAGGUUGUAUAGUU  | 204775                |

**Table S8.** Assay ID for mRNA targets (Life Technologies Corporation, Carlsbad CA, USA).

| <b>Target mRNA</b>                                        | <b>Catalog number</b> | <b>Assay ID</b> | <b>Gene group</b>                                                                      |
|-----------------------------------------------------------|-----------------------|-----------------|----------------------------------------------------------------------------------------|
| <i>Cyclin G1</i>                                          | 4351372               | Hs01063261_g1   | Cyclin-dependent protein kinases (CDKs)                                                |
| <i>p53</i>                                                | 4331182               | Hs01034249_m1   | Tumor suppressor gene                                                                  |
| <i>p63</i>                                                | 4331182               | Hs00978343_m1   | Tumor suppressor gene, epithelial cell cells biomarker.                                |
| <i>RUNX1T1</i>                                            | 4331182               | Hs00231702_m1   | Runt-related transcription factor 1; translocated to, 1 (cyclin D-related)             |
| <i>E2F5</i>                                               | 4331182               | Hs00231092_m1   | E2F family of transcription factors                                                    |
| <i>PTEN</i>                                               | 4331182               | Hs02621230_s1   | Tumor suppressor gene; Phosphatase and tensin homolog                                  |
| <i>Rictor</i>                                             | 4331182               | Hs00380903_m1   | Cell growth                                                                            |
| <i>ALK7 (ACVR1C)</i>                                      | 4331182               | Hs00899854_m1   | TGF $\beta$ receptor; activin A receptor                                               |
| <i>SIRT1</i>                                              | 4331182               | Hs01009005_m1   | Protein Deacetylation. Nicotinamide adenosine dinucleotide (NAD)-dependent deacetylase |
| mTOR                                                      | 4331182               | Hs00234508_m1   | Conserved serine/threonine kinase (signal Transduction)                                |
| E-Cadherin ( <i>CDH1</i> )                                | 4331182               | Hs01023894_m1   | Epithelial tissue biomarker                                                            |
| <i>GAPDH</i>                                              | 4331182               | Hs03929097_g1   | <b>Reference gene</b>                                                                  |
| Beta-Actin- ( <i>ACTB</i> )                               | 4331182               | Hs01060665_g1   | <b>Reference gene</b>                                                                  |
| <i>HPRT1</i> - (hypoxanthine phosphoribosyltransferase 1) | 4331182               | Hs02800695_m1   | <b>Reference gene</b>                                                                  |

**Figure S1.** miRNA expression in meningioma relative to normal control. Expression values are given as  $\Delta Cq$  values; hence, lower  $\Delta Cq$  values are equal to higher expression. Standard deviation is shown as vertical lines.

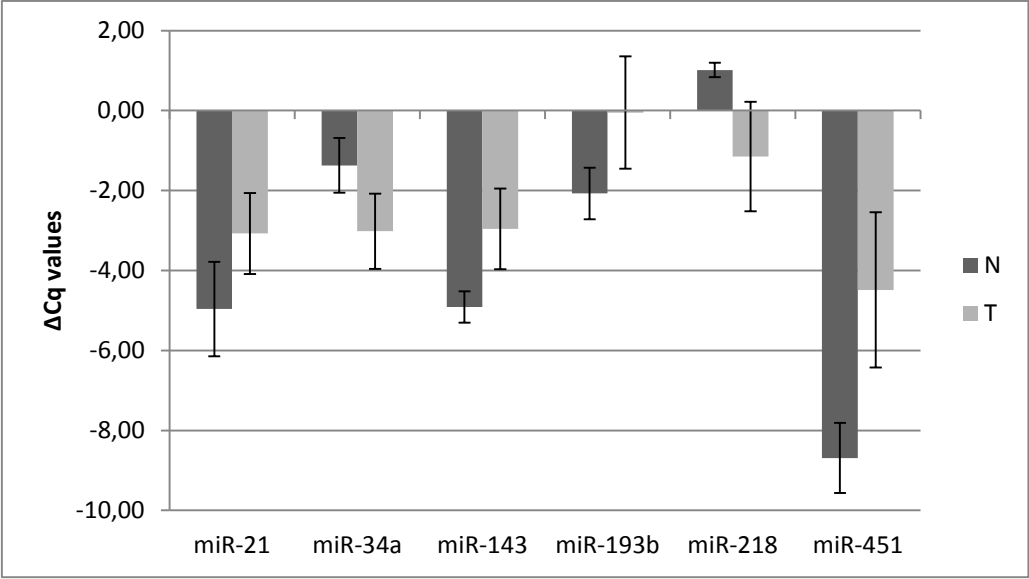

**Figure S2.** mRNA expression in meningioma relative to normal control. Expression values are given as  $\Delta Cq$  values; hence, lower  $\Delta Cq$  values are equal to higher expression. Standard deviation is shown as vertical lines.

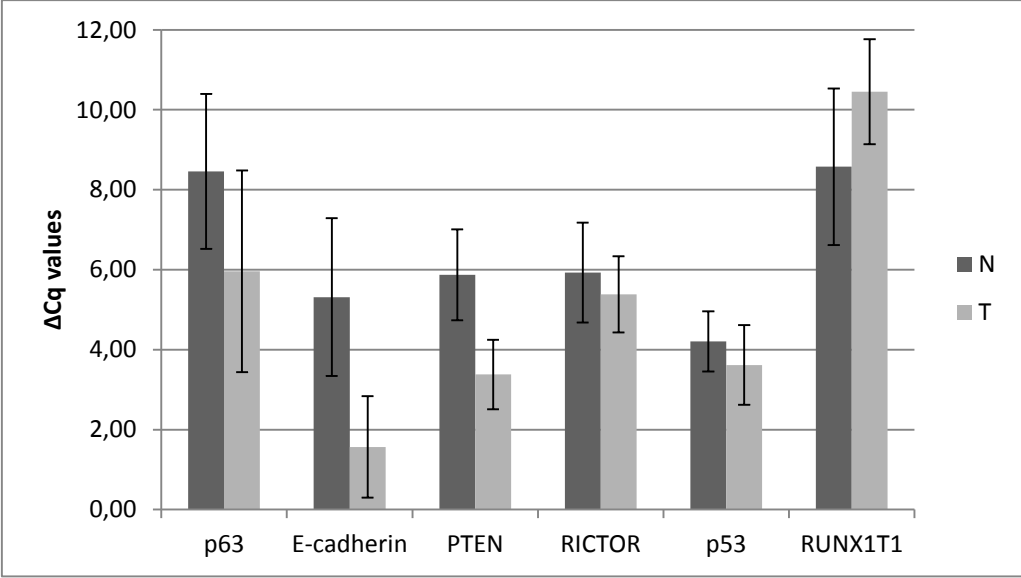

Supplement: cancers-08-00031-s001.pdf [file cancers-08-00031-s001.pdf]
